# Supplementary material for: Video games and their associations with physical health: a scoping review
Source: PubMed Central journal article supplement — BMJ Open Sport Exerc Med. 2020 Oct 2;6(1):e000832. doi: 10.1136/bmjsem-2020-000832 (PMC7547538; doi:10.1136/bmjsem-2020-000832), 2020-10-02
Supplement: bmjsem-2020-000832s001.pdf [file bmjsem-2020-000832s001.pdf]

## Annex 1: Data extraction table

| Authors (year)                     | Objectives                                                                                                                     | Physical health outcomes                     | Main relevant results                                                                                                                                                                                                                                                        | Strength of association/Group differences                                                                                                                                                                                                                                                                                                                                                                                                               |
|------------------------------------|--------------------------------------------------------------------------------------------------------------------------------|----------------------------------------------|------------------------------------------------------------------------------------------------------------------------------------------------------------------------------------------------------------------------------------------------------------------------------|---------------------------------------------------------------------------------------------------------------------------------------------------------------------------------------------------------------------------------------------------------------------------------------------------------------------------------------------------------------------------------------------------------------------------------------------------------|
| Chaput and al., 2011               | The objective was to examine the acute effects of sedentary video game play on various components of energy balance.           | Energy expenditure and energy intake         | Although energy expenditure was significantly higher during video game play than during rest, ad libitum energy intake after video game play exceeded that measured after rest. A daily energy surplus of 682 kJ over resting was observed in the video game play condition. | <ul style="list-style-type: none"> <li>• Energy balance was significantly increased (59kcal) in the video game condition compared to the control condition (t-test for dependant sample, <math>p &lt; 0.05</math>).</li> <li>• Small effect size (Cohen's d value: 0.32)</li> <li>• Strength of association for energy balance: <b>not applicable</b></li> </ul>                                                                                        |
| Desai and al., 2010                | This study examines the prevalence and clinical correlates of gaming as well as reported problems associated with video games. | Smoking and BMI                              | Among boys, gaming was associated with never smoking and not associated with BMI. Among girls, gaming was associated with a slightly higher BMI.                                                                                                                             | <ul style="list-style-type: none"> <li>• Gaming was associated with slightly higher BMI in girls (<math>p = 0.03</math>), but not in boys.</li> <li>• Girls playing video games had slightly higher average BMI measures (OR: 1.03; <math>p &lt; 0.01</math>), whereas there was no association in boys (OR: 1.0001; <math>p = 0.98</math>).</li> <li>• Strength of association for BMI: <b>very weak for girls. No association in boys.</b></li> </ul> |
| DiFrancisco-Donoghue and al., 2019 | To characterise lifestyle habits of collegiate eSport players.                                                                 | Musculoskeletal symptoms, physical activity. | The most frequently reported complaint was eye fatigue (56%), followed by neck and back pain (42%). eSport athletes reported wrist pain (36%) and hand pain (32%). Forty per cent of participants do not participate in any form of physical                                 | <p>This study is exclusively descriptive.</p> <p>(1).</p> <p>Strength of association for musculoskeletal symptoms or physical activity: <b>not applicable</b></p>                                                                                                                                                                                                                                                                                       |

|                         |                                                                                                                    |                                                                                                                                        |                                                                                                                                                                                                                                                                       |                                                                                                                                                                                                                                                                                                                                                                                                                                                                                          |
|-------------------------|--------------------------------------------------------------------------------------------------------------------|----------------------------------------------------------------------------------------------------------------------------------------|-----------------------------------------------------------------------------------------------------------------------------------------------------------------------------------------------------------------------------------------------------------------------|------------------------------------------------------------------------------------------------------------------------------------------------------------------------------------------------------------------------------------------------------------------------------------------------------------------------------------------------------------------------------------------------------------------------------------------------------------------------------------------|
|                         |                                                                                                                    |                                                                                                                                        | exercise. Among the players surveyed, only 2% had sought medical attention.                                                                                                                                                                                           |                                                                                                                                                                                                                                                                                                                                                                                                                                                                                          |
| Exelmans and al., 2015  | The aim of the current study was to investigate the association of video game volume with sleep quality in adults. | Sleep quality fatigue, insomnia, sleep duration.                                                                                       | Video gaming volume was a significant predictor of sleep quality, fatigue and insomnia.                                                                                                                                                                               | <ul style="list-style-type: none"> <li>Gaming volume was positively related with all sleeping variables, with coefficients (Pearson and Spearman) ranging between 0.104 and 0.189 (<math>p &lt; 0.01</math>).</li> <li>Strength of association for sleep: <b>weak</b></li> </ul>                                                                                                                                                                                                         |
| Hellström and al., 2015 | Investigate whether adolescent online gaming time was associated with musculoskeletal and psychosomatic symptoms.  | Musculoskeletal symptoms & psychosomatic symptoms.                                                                                     | Weekday online gaming for more than five hours a day, in combination with escape motives, was associated with musculoskeletal symptoms and psychosomatic symptoms. The probability of ill health decreased when gaming was for fun or had social motives.             | <ul style="list-style-type: none"> <li>Musculoskeletal symptoms are significantly correlated to several gaming parameters of time and frequency (0.096 to 0.170).</li> <li>Multiplayer online gaming was associated with musculoskeletal symptoms (OR 1.081, 95% CI 1.034–1.129, <math>p = 0.001</math>).</li> <li>Strength of associations for musculoskeletal symptoms: <b>weak</b></li> </ul>                                                                                         |
| Rudolph and al., 2020   | The present study examines the demographics and health behavior of video game and eSports players.                 | Duration and quality of sleep, duration of moderate to vigorous physical activity, duration of sedentary behavior, fruit and vegetable | 95% of the participant reported an excellent, very good or good health status. Two thirds of the sample engage in moderate to vigorous physical activity of more than 2.5 h a week. Across all player status groups, the median sleep quality is “quite good” and the | <ul style="list-style-type: none"> <li>Weak positive association between video game playing time and sedentary behavior (<math>\rho = 0.15</math>; <math>p &lt; 0.01</math>) and BMI (<math>\rho = 0.11</math>; <math>p &lt; 0.01</math>).</li> <li>Strength of association for BMI and sedentary time: <b>weak</b></li> <li>Weak negative association between video game playing time and self-reported health status (<math>\rho = -0.14</math>; <math>p &lt; 0.01</math>).</li> </ul> |

|                        |                                                                                                                       |                                                       |                                                                                                                                                                                                                                                                                                                                                                                                                                                                                           |                                                                                                                                                                                                                                                                                                                                                                                                                                           |
|------------------------|-----------------------------------------------------------------------------------------------------------------------|-------------------------------------------------------|-------------------------------------------------------------------------------------------------------------------------------------------------------------------------------------------------------------------------------------------------------------------------------------------------------------------------------------------------------------------------------------------------------------------------------------------------------------------------------------------|-------------------------------------------------------------------------------------------------------------------------------------------------------------------------------------------------------------------------------------------------------------------------------------------------------------------------------------------------------------------------------------------------------------------------------------------|
|                        |                                                                                                                       | consumption, general health status, and BMI.          | average sleep duration is $7.1 \pm 1.3$ h per night. Mean fruit and vegetable consumption is $2.7 \pm 1.8$ portions/day and the recommendation of five portions a day is fulfilled by 11% of the total sample.                                                                                                                                                                                                                                                                            | <ul style="list-style-type: none"> <li>• Strength of association for general health status: <b>weak</b></li> </ul> No statistically significant or relevant ( $\rho < 0.10$ ) associations are found between video game playing time and sleep parameters, physical activity, and fruit and vegetable consumption.                                                                                                                        |
| Scharrer and al., 2014 | To evaluated correlations between time spent video gaming and body mass index (BMI).                                  | BMI                                                   | Results showed no evidence of any correlation between BMI and relative time devoted to video game usage by type of, nor any support for a correspondence between overall levels of time spent with video games and BMI. Yet, the data did point to a nonlinear association in which those who devoted more than 50% of the total time they spend with video games on sedentary games had a higher BMI than those who spent less than 50% of their video gaming time with sedentary games. | <ul style="list-style-type: none"> <li>• There was no evidence of a correlation between respondents' BMI and the proportion of their video gaming time they devoted to sedentary games (<math>r = .096</math>, <math>p = .24</math>).</li> <li>• Strength of association for BMI: <b>no association</b></li> </ul>                                                                                                                        |
| Mario and al., 2014    | The association of video game playing with body composition, physical activity and eating behaviour was investigated. | BMI, physical activity, Sleep quality, energy intake. | Across the whole sample, total video-game playing (hours/week) was significantly correlated with BMI. A higher level of dietary restraint was observed in non-frequent video-game users. The two video-game groups did not                                                                                                                                                                                                                                                                | <ul style="list-style-type: none"> <li>• Energy intake was similar between frequent and non-frequent players (<math>p = 0.92</math>).</li> <li>• Total video-game playing (hours/week) was significantly correlated with BMI (<math>\rho = 0.30</math>, <math>p &lt; 0.05</math>), waist circumference (WC) (<math>\rho = 0.42</math>, <math>p &lt; 0.01</math>), Fat Mass (FM) (<math>\rho = 0.47</math>, <math>p &lt;</math></li> </ul> |

|                         |                                                                                                                                                          |                                       |                                                                                                                                                                                                                                                                |                                                                                                                                                                                                                                                                                                                                                                                                                                                                                                                                            |
|-------------------------|----------------------------------------------------------------------------------------------------------------------------------------------------------|---------------------------------------|----------------------------------------------------------------------------------------------------------------------------------------------------------------------------------------------------------------------------------------------------------------|--------------------------------------------------------------------------------------------------------------------------------------------------------------------------------------------------------------------------------------------------------------------------------------------------------------------------------------------------------------------------------------------------------------------------------------------------------------------------------------------------------------------------------------------|
|                         |                                                                                                                                                          |                                       | differ for energy intake. Frequent video-game users engaged in less vigorous physical activity.                                                                                                                                                                | <p>0.01), heart rate (HR) (<math>\rho = 0.47, p &lt; 0.01</math>) and vigorous physical activity (<math>\rho = -0.30, p &lt; 0.05</math>).</p> <ul style="list-style-type: none"> <li>• <b>Strength of association:</b> BMI, WC, FM, Vigorous physical activity: <b>moderate</b>.</li> <li>• For frequent gamers, there was a tendency for greater sleep alteration compared to non-frequent videogame users (<math>p = 0.08</math>). <b>No association</b></li> <li>• Strength of association for sleep: <b>not applicable</b></li> </ul> |
| Smyth and al., 2007     | To examine the effects of being assigned to play different video game types on game usage, health, well-being, sleep, socializing, and academics.        | General health status, sleep quality. | The Massively Multiplayer Online Role-Playing Game (MMORPG) group differed significantly from other groups after 1 month, reporting more hours spent playing, worse health and sleep quality.                                                                  | <ul style="list-style-type: none"> <li>• MMORPG group reported more hours played (<math>F(1,96) &gt; 7.32, p &lt; 0.01</math>), significantly worse overall health (<math>F(1,96) &gt; 4.14, p &lt; 0.05</math>) and worse sleep quality (<math>F(1,96) &gt; 3.97, p &lt; 0.05</math>).</li> <li>• Strength of association for overall health: <b>not applicable</b></li> <li>• Strength of association for sleep: <b>not applicable</b></li> </ul>                                                                                        |
| Wallenius and al., 2009 | Describe the reasons that motivate young people to play video games. Observe the relationships between playing video games and sleep & perceived health. | Fatigue, general health               | Waking-time tiredness and greater number of health complaints were related to an increase in ritualized motives to play video games. In addition, later bed-going time among girls and poorer health status among boys predicted higher ritualized motivation. | <ul style="list-style-type: none"> <li>• Ritualized motives contribute significantly to waking-time tiredness in boys (<math>\text{Beta} = 0.07, p &lt; 0.01</math>) and girls (<math>\text{Beta} = 0.08, p &lt; 0.01</math>).</li> <li>• Strength of association for tiredness: <b>weak</b>.</li> <li>• Ritualized motives contribute significantly health complaints in boys (<math>\text{Beta} = 0.06, p &lt; 0.01</math>) and girls (<math>\text{Beta} = 0.06, p &lt; 0.05</math>).</li> </ul>                                         |

|                      |                                                                                                                                                                              |                             |                                                                                                                                                                       |                                                                                                                                                                                                                                                                                                                                                                                                                               |
|----------------------|------------------------------------------------------------------------------------------------------------------------------------------------------------------------------|-----------------------------|-----------------------------------------------------------------------------------------------------------------------------------------------------------------------|-------------------------------------------------------------------------------------------------------------------------------------------------------------------------------------------------------------------------------------------------------------------------------------------------------------------------------------------------------------------------------------------------------------------------------|
|                      |                                                                                                                                                                              |                             |                                                                                                                                                                       | <ul style="list-style-type: none"> <li>• Strength of association for general health: <b>weak</b>.</li> </ul>                                                                                                                                                                                                                                                                                                                  |
| Weaver and al., 2009 | The goal of this study was to distinguish adult video-game players from non-players on the basis of personal and environmental factors.                                      | General health status, BMI. | Video game players reported poorer health status than non-players.<br>Video-game players reported higher BMI.                                                         | <ul style="list-style-type: none"> <li>• Video-game players had a higher BMI than non-gamers (M=28.06 vs M=26.55, p&lt;0.05).</li> <li>• As per canonical correlation, strength of association for BMI: <b>moderate</b>.</li> <li>• Video-game players reported a poorer health status than non-players (M=3.63 vs M=3.86, p&lt;0.05)</li> <li>• Strength of association for health status: <b>not applicable</b>.</li> </ul> |
| Zapata and al., 2006 | The objective of the present study was to evaluate the presence of pain and musculoskeletal pain syndromes in adolescents and associate them to computer and video game use. | Musculoskeletal symptoms    | In the univariate analysis, no statistical association was observed between video game use and back pain, pain in trapezius muscle, upper limb pain and diffuse pain. | <ul style="list-style-type: none"> <li>• No statistical association was observed between video game use and back pain, pain in trapezium muscle, upper limb pain and diffuse pain (<b>correlation statistics not presented</b>).</li> <li>• Strength of association for musculoskeletal symptoms: <b>no association</b></li> </ul>                                                                                            |

BMI= body mass index, OR= odd ratio, F= omnibus F test, M= mean,
